1 **Short Title**

2 Diploid gametes rescue hybrid sterility in rice

3 **Author for Contact details**

4 \* Yuji Kishima; Laboratory of Plant Breeding, Research Faculty of Agriculture,  
5 Hokkaido University, Kita-ku Kita 9 Nishi 9, Sapporo 060-8589, Japan.  
6 +81-11-706-2439, e-mail to kishima@abs.agr.hokudai.ac.jp

7 **Title**

8 Diploid male gametes circumvent hybrid sterility between Asian and African rice  
9 species

10 **Authors**

11 Daichi Kuniyoshi<sup>†</sup>, Itaru Masuda<sup>†</sup> Yoshitaka Kanaoka<sup>†</sup>, Yuki Shimazaki-Kishi<sup>†</sup>,  
12 Yoshihiro Okamoto<sup>‡</sup>, Hideshi Yasui<sup>¶</sup>, Toshio Yamamoto<sup>§</sup>, Kiyotaka Nagaki<sup>§</sup>,  
13 Yoichiro Hoshino<sup>#</sup>, Yohei Koide<sup>†</sup>, Itsuro Takamure<sup>†</sup>, Yuji Kishima<sup>†,\*</sup>

14 **Affiliations**

15 <sup>†</sup> Laboratory of Plant Breeding, Research Faculty of Agriculture, Hokkaido  
16 University, Kita-ku Kita 9 Nishi 9, Sapporo 060-8589, Japan.

17 <sup>‡</sup> Laboratory of Plant Breeding, Rakuno Gakuen University, Bunkyodai-  
18 Midorimachi, Ebetsu 069-8501, Japan.

19 <sup>¶</sup> Plant Breeding Laboratory, Faculty of Agriculture, Kyushu University, 744  
20 Motooka Nishi-ku, Fukuoka 819-0395, Japan.

21 <sup>§</sup> Institute of Plant Science and Resources, Okayama University, Chuo 2-20-1,  
22 Kurashiki 710-0046 Okayama, Japan.

23 <sup>#</sup> Field Science Center for Northern Biosphere, Hokkaido University, Kita-ku Kita  
24 11 Nishi 10, Sapporo 060-0811, Japan.

25 **One sentence summary**

26 Anomaly diploid male gametes that occurred in an interspecific hybrid between  
27 Asia and Africa rice species circumvent hybrid sterility and produce fertile seeds.

28 **Author contributions**

29 DK and YKi conceived and planned the work. DK, IM, YKa, and YS-K  
30 performed the experiments and analyzed the data. YO directed the anther culture  
31 procedure. HY arranged the materials. DK, YT, and KN performed  
32 immunochemical staining. YH assisted with the ploidy analysis. YKo assisted with  
33 the data analyses. IT supported the mitotic observations. DK and YKi wrote and  
34 improved the manuscript. YKi supervised DK's PhD study.

### 35 **Funding information**

36 This work was supported by grants from JSPS KAKENHI (no. 19H00937 to YKi)  
37 and the Hokkaido University Research and Education Center for Robust  
38 Agriculture, Forestry and Fisheries Industry (to YKi). This work was partly  
39 supported by the Joint Usage/Research Center, Institute of Plant Science and  
40 Resources, Okayama University.

### 41 **Email address of Author for Contact**

42 kishima@abs.agr.hokudai.ac.jp

43

44 **Abstract**

45 In F<sub>1</sub> hybrids of *Oryza sativa* (Asian rice) and *O. glaberrima* (African rice), heterozygosity  
46 leads to a complete gamete abortion because of allelic conflict at each of the 13 *hybrid*  
47 *sterility* (*HS*) loci. We systematically produced 19 plants from the F<sub>1</sub> hybrids of both the  
48 rice species by the anther culture (AC) method. Five of the 19 interspecific hybrid plants  
49 were fertile and able to produce seeds. Unlike ordinal doubled haploid plants resulting from  
50 AC, these regenerated plants showed various ploidy levels (diploid to pentaploid) and  
51 different zygosities (completely homozygous, completely heterozygous, and a combination).  
52 These properties were attributable to meiotic anomalies in the interspecific hybrid F<sub>1</sub> plants.  
53 Examination of the genetic structures of the regenerated plants suggested meiotic non-  
54 reduction took place in the interspecific hybrid F<sub>1</sub> plants. The centromeric regions in the  
55 regenerated plants revealed that the abnormal first and/or second divisions of meiosis,  
56 namely the first division restitution (FDR) and/or second division restitution (SDR), had  
57 occurred in the interspecific hybrid. Immunohistochemical observations also verified these  
58 phenomena. FDR and SDR occurrences at meiosis might strongly lead to the formation of  
59 diploid microspores. The results demonstrated that meiotic anomalies functioned as a  
60 reproductive barrier occurred before the *HS* genes acted in gamete of the interspecific  
61 hybrid. Although such meiotic anomalies are detrimental to pollen development, the early  
62 rescue of microspores carrying the diploid gamete resulted in the fertile regenerated plants.  
63 The five fertile plants carrying tetraploid genomes with heterozygous alleles of the *HS* loci  
64 produced fertile diploid pollens, implying that the diploid gametes circumvented the allelic  
65 conflicts at the *HS* loci. We also proposed how diploid male gametes avoid HS with the  
66 killer-protector model.

67

68 **Keywords**

69 Anther culture, Fertile plants, Hybrid sterility, Interspecific hybrid, Meiosis, Rice,  
70 Tetraploid

71

72

73 **Introduction**

74 Although cultivated rice species *Oryza sativa* (Asian rice) and *O. glaberrima* (African rice)  
75 both have AA genomes, the first filial generation (F<sub>1</sub>) between these two species does not  
76 produce fertile seeds [1, 2]. This type of reproductive isolation, designated as hybrid  
77 sterility (HS), is associated with abnormal gamete development and sterility [1, 2, 29]. To  
78 date, 13 *HS* loci have been reported to be involved in HS in F<sub>1</sub> hybrids between *O. sativa*  
79 and *O. glaberrima* (*sat-gla*) [4-7, 9-15]. In particular, pollen sterility is noticeable in these  
80 hybrids, and fertility is completely lost; in contrast, female gametes do not exhibit such  
81 severe sterility, as seeds are produced when fertile pollen grains are crossed [16, 17].  
82 However, microspores in the process of completing meiosis and developing into pollen can  
83 differentiate into plants. If pollen destined for abortion can be rescued during early  
84 developmental stages, it could create hybrid plants. Not only are these individuals useful as  
85 genetic resources, but they also have a high potential in elucidating the mechanism of  
86 hybrid sterility.

87

88 In the 1960s, Gopalakrishnan et al. [30] and Oka [31] created individuals producing fertile  
89 seeds in F<sub>1</sub> tetraploid hybrids of *sat-gla*. In 1980, Woo and Huang reported that anther  
90 culture (AC) of an F<sub>1</sub> hybrid of *sat-gla* gave rise to tetraploid, diploid, and haploid plants  
91 [32]. Unfortunately, these significant findings were given scant attention, being published  
92 too early to be of wide interest. The results described in those studies have thus not been  
93 validated, and the fertility of such F<sub>1</sub> tetraploid hybrids has not been analyzed in detail.  
94 Furthermore, the mechanism responsible for the formation of polyploids following AC of  
95 the interspecific hybrids has not been studied subsequently. In these interspecific hybrids,  
96 detailed observations are required to determine if pairing between genomes occurs during  
97 meiosis and whether distributions of homologous chromosomes in the first meiotic division  
98 and/or sister chromatids in the second meiotic division take place.

99

100 AC technology developed in the 1960s [20, 21] and now widely used in crops [22, 23],  
101 haploid genomes derived from male gametes can be doubled to form a doubled haploid



102 (DH) individual with complete homozygosity. The differentiated individual from AC is,  
103 therefore, a complete pure line. In autogamous crops, a pure line is an essential condition  
104 for cultivars; consequently, AC technology has contributed to the breeding of many crops  
105 [24, 25].

106

107 Our previous study revealed that AC of an F<sub>1</sub> hybrid of *sat-gla* can generate calli from  
108 anther-containing microspores in the late uninucleate stage [26]. In the present study, 19  
109 plants were differentiated from such calli after a regeneration treatment, and some  
110 individuals of successively obtained plants produced seeds. The differentiated individuals  
111 were tetraploid and exhibited heterozygosity in many genomic regions, which might cause  
112 allelic conflicts of *HS* loci. Many studies on HS have mainly focused on *HS* genes such as  
113 *HS* loci, but little attention has been paid to other genetic factors. These tetraploids were  
114 mainly a consequence of meiotic anomalies attributable to a failure during first or second  
115 meiotic divisions. Here, we demonstrate that diploid gametes can circumvent HS between  
116 *sat-gla* and thus allow fertile individuals to be regenerated. We also examine the  
117 relationship between meiotic anomalies and HS and discuss the defeat of HS by  
118 polyploidization.

119

120

121

## 122 **Results**

### 123 **Pollen sterility of interspecific F<sub>1</sub> hybrids**

124 Interspecific hybrids between *sat-gla* are well known to exhibit severe HS that possibly  
125 involves more than a dozen *HS* genes (Sano et al., 1979; Sano, 1983, 1990; Doi et al., 1998;  
126 Doi et al., 1999; Taguchi et al., 1999; Ren et al., 2006; Zhang et al., 2006; Li et al., 2011;  
127 Xu et al., 2014; Yu et al., 2018). An interspecific F<sub>1</sub> hybrid of *O. sativa* L. ssp. *japonica*  
128 Nipponbare (Nip) and *O. glaberrima* Steud. accession IRGC 104038 from Senegal  
129 (designated as WK21) produced panicles with sterile seeds as a consequence of aborted  
130 pollen and a partially fertile embryo sac (Fig. 1A). The mature pollen grains from  
131 WK21/Nip F<sub>1</sub> were less strongly stained by Lugol's solution, indicating their sterility and  
132 inability to accumulate polysaccharides (Fig. 1A). To explore the progression of this pollen  
133 sterility, we observed developing pollen grains in Nip, WK21, and WK21/Nip F<sub>1</sub> (Fig. 1B).  
134 As development continued, pollen grains of both parents first showed evidence of  
135 acetocarmine staining at the early binucleate stage and were fully stained at the trinucleate  
136 stage (Fig. 1B). During the early uninucleate stage of pollen development, most  
137 microspores from WK21/Nip F<sub>1</sub> plants exhibited no prominent differences in size or shape  
138 compared with the parents (Fig. 1B), but some had abnormal structures, such as a fused  
139 form or a larger size than that of normal microspores (Fig. 1C). The proportion of standard-  
140 shaped microspores in WK21/Nip F<sub>1</sub> plants decreased as they developed into pollen (Fig.  
141 1B). At the mature stage, normal, round pollen grains had disappeared, and the number of  
142 cavitated pollen grains had increased (Fig. 1B).

143

### 144 **Plant regeneration from calli of interspecific F<sub>1</sub> hybrids**

145 In previous research, Kanaoka et al. (2018) successfully rescued microspores at the late  
146 uninucleate stage in interspecific hybrid plants (WK21/Nip F<sub>1</sub> and its reciprocal cross  
147 hybrid Nip/WK21 F<sub>1</sub>) to induce calli by the AC method with RI-13 medium. In that study,  
148 98 calli were obtained from 28,181 anthers, which corresponded to induction frequencies of  
149 approximately 11 calli from 14,724 Nip/WK21 anthers and 87 calli from 13,457  
150 WK21/Nip anthers (Supplemental Table S1). In the present study, we used the 87 calli

151 derived from WK21/Nip F<sub>1</sub> for plant regeneration. The 11 Nip/WK21 calli (the opposite  
152 cross combination to WK21/Nip) were not used because only a single plantlet was  
153 generated. Distinct frequencies of callus generation between the two reciprocal hybrids  
154 were used to infer whether certain sporophytic influences were due to cytoplasmic or  
155 maternal effects of the parental plants. Regeneration of plants from calli was attempted  
156 using N6-based medium. We obtained 19 regenerated plantlets from the WK21/Nip F<sub>1</sub>-  
157 anther derived calli (Supplemental Table S1; Supplemental Fig. S1). Thirteen plantlets  
158 were regenerated from 23 Nip calli induced with SK-1 medium, whereas no plantlets were  
159 regenerated from WK21 calli in this study (Supplemental Table S1). The 19 plantlets from  
160 the WK21/Nip F<sub>1</sub>-anther derived calli were grown in soil; 17 became mature plants, while  
161 two died (Supplemental Fig. S1). Two phenotypic traits typically different between *sat-gla*,  
162 namely, leaf smoothness and awn presence, were segregated in the 17 regenerated plants  
163 and both parents (Fig. 2A, B).

164

### 165 **Genotyping of regenerated plants**

166 The 19 plantlets grown as seedlings from callus were genotyped with 22 simple sequence  
167 repeat (SSR) markers located on the 12 rice chromosomes and polymorphic between the  
168 two parents (Supplemental Fig. S2, S3). In general, the DH plants obtained via AC had  
169 completely homozygous genomes as a result of the doubling of the male gametic genome.  
170 Any heterozygotes may have been due to DNA of somatic tissues (e.g., from anther walls)  
171 of the F<sub>1</sub> hybrid plants, but we could not rule out the possibility of allopolyploids involving  
172 both parental genome sets. As shown in Fig. 2A, genotyping of the 19 plantlets revealed  
173 that two plantlets (#60 and #96) were completely homozygous (Hom) for either genotype at  
174 each marker locus, while five plantlets (#38, #39, #61, #79, and #88) were heterozygous  
175 (Het) at all loci. The remaining 12 individuals had mixed genomes (Hom/Het) containing  
176 both homozygous and heterozygous loci (Fig. 2A). The coexistence of homozygous and  
177 heterozygous loci in the plantlets derived from AC has two possible causes: an abnormality  
178 of meiosis in the parental plants or fusions between cells containing homozygotes and/or  
179 heterozygotes during callus culture. These results are in contrast to the observations of

180 Morinaga and Kuriyama (1957), who did not detect any meiotic anomalies in their  
181 cytological study of interspecific hybrids between *sat-gla*.

182

### 183 **Ploidy analysis of regenerated plants**

184 To examine ploidy levels of the 19 regenerated plantlets obtained from AC, we performed a  
185 flow cytometric analysis (Fig. 3A). Ploidy levels of the analyzed samples were based on  
186 relative fluorescence intensity comparisons with the parental diploid. As shown in Fig. 3B,  
187 five of the 19 plantlets were diploid, and 12 regenerated plants—eight tetraploids, three  
188 triploids, and a pentaploid—were polyploid. No haploids were obtained. No apparent  
189 relationship was observed between ploidy level and degree of homo- or heterozygosity, but  
190 the three triploids were commonly Het plantlets (Fig. 2; Supplemental Table S2). Among  
191 the 12 Hom/Het plantlets, five were diploid, one was pentaploid, and six were tetraploid  
192 (Supplemental Table S2). Microscopic observation also supported the results of the flow  
193 cytometric analysis: root tip cells from the examined plantlet (#20) had a chromosome  
194 number larger than 40, compared with 24 chromosomes in the parental *sat-gla* diploid (Fig.  
195 3C). Unlike AC of intraspecific hybrids, which usually produces DH plants, AC of the  
196 interspecific *sat-gla* F<sub>1</sub> hybrid resulted in many polyploid regenerants (12/19). These  
197 results led us to consider whether microspores from the F<sub>1</sub> hybrid were directly responsible  
198 for the aberrant ploidy levels.

199

### 200 **Origin of the Hom/Het plants**

201 We considered three possible causes for the polyploidy of the regenerants. First, the 12  
202 Hom/Het plants (#13, #16, #19, #20, #25, #28, #47, #63, #70, #74, #80, and #91) were  
203 expected to result from the generation of abnormal tetrads through incomplete meiotic  
204 reduction. These meiotic anomalies involve two major arrests of meiotic reduction: first  
205 division restitution (FDR) and second division restitution (SDR) (Jauhar, 2007; De Storme  
206 and Geelen, 2013; Han et al., 2018) (Fig. 4A). FDR is the halt in division of homologous  
207 chromosomes after recombination during meiosis I, while SDR is the arrest of the  
208 separation of paired sister chromatids during meiosis II (Fig. 4A). Either meiotic division

209 restitution produces microspores carrying diploid Hom/Het genomes. Diploid microspores  
210 with Hom/Het genomes may be duplicated during callus formation or regeneration  
211 processes, resulting in tetraploid Hom/Het plants. In regard to possible causes of  
212 incomplete meiotic reduction, we could test whether FDR or SDR was responsible for the  
213 Hom/Het plants. Hom/Het plants arising by FDR were expected to exhibit heterozygosity  
214 (i.e., both parental sequences) around centromeric regions (De Storme and Geelen, 2013).  
215 Because centromeric regions rarely undergo recombination, centromeric regions in paired  
216 homologous chromosomes between *sat-gla* remained heterozygous after meiosis I (Fig.  
217 4A). In contrast, Hom/Het plants generated by SDR would have homozygous centromeric  
218 regions (i.e., either parental sequence) because of the cancellation of sister-chromatid  
219 separation during meiosis II (De Storme and Geelen, 2013) (Fig. 4A). To distinguish  
220 between these two possibilities, the 12 chromosomes of the 12 regenerants were genotyped  
221 using centromeric-region-specific SSR and insertion/deletion polymorphism (InDel)  
222 primers (McCouch et al., 2002) (Supplemental Fig. 2). Genotyping of the centromeric  
223 regions yielded homozygous bands for the Hom plants and heterozygous bands for the Het  
224 plants (Supplemental Table S2 and Fig. 3). Genotyping of the 12 Hom/Het plants  
225 uncovered two clear patterns: eight individuals (#13, #19, #20, #25, #47, #63, #74, and  
226 #80) were heterozygous for all the markers in centromeric regions, while the remaining  
227 four individuals (#16, #28, #70, and #91) were homozygous (Fig. 4B). These results  
228 suggest that the first eight Hom/Het plants resulted from FDR and that the latter four plants  
229 were derived from SDR. These observations of pollen mother cells (PMCs) verify the  
230 occurrence of abnormalities at meiosis in the interspecific F1 hybrid between *sat-gla* (Fig.  
231 4C, D) possibly associated with the unusual shapes of microspores shown in Fig. 1C.  
232 Normal bivalent chromosomes observed at diplotene in meiosis I are necessary for  
233 reduction division, which leads to meiosis II, whereas univalent chromosomes in meiosis I  
234 are unable to undergo normal division, resulting in loss of meiosis I. We obtained evidence  
235 that germinal cells in the interspecific F<sub>1</sub> hybrid retained univalent chromosomes. As shown  
236 on the left side of Fig. 4C, immunochemical staining with anti-*Oryza sativa* centromeric  
237 histone H3 (OsCenH3) antibody revealed a numerous pairs of centromeric signals, which

238 implies alignment of bivalent chromosomes at diplotene in PMCs. In the same PMC  
239 sample, another gamete cell exhibited unpaired centromeric signals that were given by the  
240 presence of univalent chromosomes (right side of Fig. 4C). During anaphase II, we also  
241 observed unequal division, in which spindle fibers with  $\alpha$ -tubulin were not equally formed  
242 in dividing cells (right side of Fig. 4D) relative to normal division (left side of Fig. 4D).  
243 These observations in PMCs of the interspecific F<sub>1</sub> hybrid support the occurrence of FDR  
244 and SDR in meiosis I and II, respectively.

245

246 Second, five Het plants corresponding to three triploids (#39, #79, and #88), one tetraploid  
247 (#38), and one missing (#61) obviously contained both parental genomes (Fig. 2A). PMCs  
248 that failed to undergo both divisions at meiosis I and II may not have formed tetrads. The  
249 occurrence of both division restitutions in a single meiocyte may therefore have given rise  
250 to tetraploid Het plants; however, making an assumption about whether the heterozygotic  
251 status of the triploids was due to simple aberrant meiosis or a complex process mediated by  
252 other factors is difficult. Third, in the Hom plants (#60 and #96), #96 with tetraploid  
253 genome may have arisen by haploid gamete doubling, but we could not ascertain exactly  
254 when doubling occurred during the AC procedure (Fig. 2A).

255

### 256 **Fertility and *HS* locus genotypes of regenerated plants**

257 Among the 19 plantlets obtained from AC, 17 grew to maturity, while two (#60 and #61)  
258 died at the seedling stage. Of the surviving regenerated plants, the five tetraploid ones (#20,  
259 #25, #38, #47, and #80) generated seeds (Table 1). More specifically, the five fertile  
260 tetraploid plants comprised four Hom/Het plants and one Het plant (Fig. 2A). The precise  
261 fertility of each of these five plants could not be determined because they had inherited the  
262 shattering trait from their parent *O. glaberrima* WK21; however, two regenerated plants,  
263 #38 and #80, produced a relatively higher number of seeds. To confirm that HS had been  
264 overcome in the regenerants, the 17 regenerants were genotyped using 12 SSR primers  
265 linked to known *HS* loci (Kanaoka et al., 2018). As shown in Table 1, plant #96 was  
266 homozygous for alleles from either of the two parents at each SSR locus (Table 1). In the

267 four Het plants (#38, #39, #79, and #88), the *HS* locus-specific SSR markers were all  
268 heterozygous (Table 1). The Hom/Het plants were mixed, carrying both homozygotic and  
269 heterozygotic loci (Table 1). The three fertile tetraploid plants, #25, #38, and #80, were  
270 heterozygous at more than eight *HS* loci, a situation that would have caused sterility if these  
271 plants had been diploid. Our results are in agreement with the observations of  
272 Gopalakrishnan et al.(1964) and Oka (Oka, 1968) that the tetraploidy of the interspecific  
273 hybrid allowed escape from HS.

274

### 275 **Phenotypes of fertile tetraploids**

276 Seeds (RP2) from #80 plants were larger than those of the parents: 1.42- and 1.34-fold  
277 longer and 1.33- and 1.38-fold wider relative to Nip and WK21, respectively (Supplemental  
278 Table S3). Likewise, fertile plants in the next generation (RP3) also produced bigger seeds  
279 (Supplemental Table S3). Of the five fertile tetraploid plants, the fertilities of plants from  
280 #25, #38, and #80 were passed along to subsequent generations. These plants thus appeared  
281 to have overcome the HS between *sat-gla*. Self-pollinated progenies of three fertile  
282 tetraploid lines, RP2-25 (from #25), RP2-38 (from #38), and RP2-80 (from #80), were  
283 obtained and phenotypically compared with their parental lines, Nip and WK21. The  
284 following characters were measured: seed length, seed width, plant height, leaf length, leaf  
285 breadth, ligule length, and pistil color (Supplemental Table S3). Most phenotypes in the  
286 second generation derived from the three tetraploid regenerated lines were larger than those  
287 of their parents (Supplemental Table S3), thus reflecting typical tetraploid vigor. In regard  
288 to pistil color, the blackish purple pistils of WK21 were expressed in the F<sub>1</sub> generation and  
289 RP2-25 and RP2-38 lines, while the white pistils of Nip were inherited by the RP2-80 line  
290 (Supplemental Table S3).

291

292

293



294 **Discussion**

295 **Production of plants from hybrids between *sat-gla* by AC**

296 Because of gamete sterility, progenies cannot be generated from interspecific hybrids of  
297 *sat-gla* (Oka, 1957; Sano et al., 1979). In this study, we successfully regenerated plants  
298 from callus induced by culturing sterile microspores of interspecific hybrid plants without  
299 the recombinant DNA techniques. Five of the 19 regenerated plants produced seeds.

300 According to Kanaoka et al. (2018), the essential factor for obtaining plants from  
301 interspecific hybrids with strong HS is the use of callus obtained by culturing anthers with  
302 microspores at the uninucleate stage. Uninucleate-stage microspores are required for  
303 embryogenesis not only in rice but also in wheat (Hassawi and Liang, 1990). In grape  
304 (Gribaudo et al., 2004), barley (Hoekstra et al., 1992), and *Brassica napus* (Telmer et al.,  
305 1992), embryoid bodies can also be differentiated directly from uninucleate microspores.  
306 Microspores appear to lose their embryogenic (or callus formation) ability after the  
307 uninucleate stage, and differentiation into pollen then irreversibly progresses (Kinoshita et  
308 al., 2000). Even in the interspecific hybrid between *sat-gla* exhibiting HS, microspore  
309 decay had not yet begun in uninucleate microspores (Figs. 1B, C, 5A). This stage is a  
310 crucial point for rescuing microspores to obtain plants from AC of interspecific hybrids  
311 (Kinoshita et al., 2000) (Fig. 5A).

312  
313 Diploid plants differentiated through AC usually have complete homozygosity because  
314 haploid male gametes are spontaneously doubled during the differentiation process. In this  
315 study, only two DH lines were detected among the 19 regenerated plants (Fig. 2A). The  
316 other individuals differed in terms of zygoty and ploidy level from ordinal diploid DH  
317 lines (Supplemental Table S2). We could thus readily infer that abnormalities occurred  
318 during male gametophyte formation in the interspecific hybrid. We therefore examined  
319 anomalies related to male gametophyte formation from two perspectives, genomic zygoty  
320 and ploidy level.

321

322 **Variations in zygoty**



323 Individuals derived by AC of the interspecific hybrid were divided into three groups on the  
324 basis of zygosity: 1) Hom individuals having completely homozygous genomes, 2) Het  
325 individuals with complete heterozygosity, and 3) Hom/Het plants having both homozygous  
326 and heterozygous genomic regions (Fig. 2A). The first group presumably originated from  
327 cases in which the haploid genome of a gamete spontaneously doubled during callus  
328 formation or regeneration in an AC-derived rice plant (Rout et al., 2016; Naik et al., 2017).  
329 The complete heterozygosity of plants in the second group had two possible causes (Huang  
330 et al., 1997): a) callus formation of the F<sub>1</sub> somatic cells, such as anther wall cells, and b)  
331 callus formation occurring in the PMC harboring the paired genomes before the first  
332 meiotic division. The third group, which included both homozygous and heterozygous  
333 regions, may have emerged after meiotic recombination (Pinson and Rutger, 1993).  
334 Tetraploid Hom/Het plants may have been derived from microspores in which the diploid  
335 genome was doubled during callus development, while diploid Hom/Het plants may have  
336 arisen from microspores formed from callus without genome doubling. AC of rice  
337 intraspecific hybrids rarely produced Hom/Het plants, which were derived from diploid  
338 microspores (Grewal et al., 2011).

339

#### 340 **Meiotic anomalies**

341 In AC of rice, plant differentiation occurs via callus. The most active period of callus  
342 formation during pollen development corresponds to the middle to late uninucleate  
343 microspore stage. We observed abnormal forms of microspores at the uninuclear stage in  
344 the interspecific hybrid, such as microspores that were twice the size of normal ones and  
345 fusions of two microspores (Fig. 1C). Flow cytometry and chromosome observations  
346 demonstrated that many regenerated plants were tetraploid, triploid, or pentaploid (Fig. 3).  
347 These observations suggest that meiotic anomalies of interspecific hybrids lead to  
348 insufficient microspore separation and occasional fusion at the tetrad stage. Our genomic  
349 analysis revealed that 12 of 19 regenerated plants resulted from abnormalities in division  
350 after meiotic recombination (Fig. 4B). Anomalies in meiotic divisions were also observed  
351 by immunohistochemical staining for OsCenH3 and  $\alpha$ -tubulin (Fig. 4C, D). These meiotic

352 anomalies involved cancellation of either the first or second division, thereby leading to  
353 diploid gametophyte generation and subsequent polyploid formation during plant  
354 regeneration from callus (Fig. 4) (Jauhar, 2007; De Storme and Geelen, 2013; Han et al.,  
355 2018). In some cases, neither the first nor the second division occurred, and the tetraploid  
356 gametes were able to develop into callus and differentiate directly into plants. Although a  
357 detailed explanation for how triploid and pentaploid plants were generated from AC of the  
358 hybrid could not be determined, we were able to deduce the mechanisms associated with  
359 the occurrence of tetraploidy based on meiotic anomalies in the interspecific hybrid.

360

361 Because most male gametes in F<sub>1</sub> hybrids between *sat-gla* should decay during pollen  
362 development, determination of the genome harbored by each gamete has not been possible.  
363 In this study, we demonstrated that genetic characterization of male gametes in hybrid  
364 plants between *sat-gla* is feasible by rescuing abortive microspores with AC and allowing  
365 them to differentiate into plants. More than a dozen *HS* loci between *sat-gla* can act on  
366 male and/or female gametes and, in particular, cause male gametes to become sterile  
367 (Koide et al., 2008; Garavito et al., 2010; Kanaoka et al., 2018). Although *HS* genes are  
368 widely known to be responsible for HS, our study has clearly shown that meiotic anomalies  
369 occur before these genes act (Fig. 5A). Alternatively, meiotic anomalies may also be one of  
370 the causes of HS that collapses the gamete genome (Fig. 5A). Future required work  
371 includes a detailed analysis of meiotic anomalies occurring in PMCs in hybrids and  
372 clarification of the relationship between the mechanism of non-segregation of the first and  
373 second divisions and gamete decay.

374

### 375 **Ploidy levels and HS avoidance mechanisms**

376 Among the plants derived from AC, all five plants that produced seeds had tetraploid and  
377 heterozygous genomic regions. Four of these five fertile plants were Hom/Het, and one was  
378 a completely Het individual. The four Hom/Het plants also had many alleles of *HS* loci as  
379 heterozygote. Gametes possessing a killed allele at an *HS* locus will not survive (Sano et al.,  
380 1979; Jones et al., 1997). The existence of multiple *HS* loci reduces the number of

381 surviving gametes by one-half per each additional locus. More than a dozen *HS* loci have  
382 been found between *sat-gla*, and most of the hybrid gametes are sterile or die (Sano et al.,  
383 1979; Sano, 1983, 1990; Doi et al., 1998; Doi et al., 1999; Taguchi et al., 1999; Ren et al.,  
384 2006; Zhang et al., 2006; Li et al., 2011; Xu et al., 2014; Yu et al., 2018). In the present  
385 study, fertile plants were obtained from a tetraploid with heterozygous *HS* alleles. Except  
386 for backcross lines with either parent, we never obtained fertile plants from self-pollinated  
387 interspecific F<sub>1</sub> hybrids between *sat-gla* (Table 1; Supplemental Table S2). Among the 19  
388 regenerated plants from AC, in contrast, we obtained five fertile plants, all of which were  
389 tetraploids. Polyploidization may thus be a way to remove the barrier between the two  
390 species.

391

392 The *HS* genes responsible for the *SI* locus between *sat-gla* have recently been isolated (Xie  
393 et al., 2017; Koide et al., 2018; Xie et al., 2019), thus allowing the mechanism of the killer-  
394 protector system to be elucidated. In this system, a killer gene is linked to a protector gene  
395 that protects gametes from the action of the former (Yang et al., 2012; Ouyang and Zhang,  
396 2013; Zhu et al., 2017; Xie et al., 2019). When a protector gene is present in the same  
397 gamete, the killer allele is protected against the killer protein itself. If so, the killer gene at  
398 the *HS* locus appears to sporophytically act on other gametes (not encased in the same  
399 membrane) that do not have a protector after separation into a tetrad. Tetraploids from *sat-*  
400 *gla* hybrids are likely fertile because three-quarters of diploid gametes from a tetraploid  
401 plant contain both killer and protector alleles (Fig. 5B). In contrast, a diploid plant derived  
402 from hybrids between *sat-gla* produces haploid gametes, a half of which may contain both  
403 killer and protector alleles (Fig. 5B). Although the different killer-protector allele ratios in  
404 gametes may reflect the distinct seed fertilities of the tetraploid vs. the diploid, the killer-  
405 protector system is not the only explanation for these observations.

406

#### 407 **Characteristics of fertile plants obtained from AC**

408 Five lines of fertile tetraploids, #20, #25, #38, #47, and #80, were obtained by AC of the  
409 interspecific hybrid of *sat-gla* (Table 1; Supplemental Table S2). The seed sizes of #38 and

410 #80 lines, which produced sufficient seeds, were respectively 1.3 to 1.4 times larger than  
411 those of the parental lines and were inherited by the next generation (Supplemental Table  
412 S3). Plant heights, flag-leaf lengths, flag-leaf widths, and ligule lengths of plants grown  
413 from the seeds of #25, #38, and #80 were superior to the parental traits (Supplemental  
414 Table S3). This typical biomass enlargement may have been due to tetraploidization;  
415 alternatively, heterosis may have occurred, as the genomes of these strains were  
416 heterozygous. In the *sat-gla* diploid F<sub>1</sub> hybrid, however, the values of these traits were  
417 often intermediate between those of the parents, and the tetraploid vigor was thus unlikely  
418 the result of heterosis (Supplemental Table S3). Even if heterosis was a factor—given that  
419 these tetraploid plants retained heterozygous genomes—the maintenance of heterotic traits  
420 in the progeny would be difficult.

421

422 In a tetraploid plant with two different alleles at a locus, 10 generations are theoretically  
423 required to reduce the proportion of heterozygotes to less than one-quarter of a population;  
424 in a diploid plant, this percentage is achieved by the third generation. This characteristic  
425 implies that the number of generations during which recombination can take place in a  
426 heterozygous tetraploid is much larger compared with a diploid (Pecinka et al., 2011).  
427 Tetraploid hybrid plants therefore have the potential to create highly variable allelic  
428 combinations by repeated recombination during meiosis.

429

430

## 431 **Materials and Methods**

### 432 **Plant materials and AC**

433 The calli derived from AC in this study originated from the same materials obtained by  
434 Kanaoka et al.(2018). Interspecific F<sub>1</sub> hybrid individuals were produced by crossing *O.*  
435 *glaberrima* Steud. with *O. sativa* L. ssp. *japonica*. The seed parent *O. glaberrima* accession  
436 IRGC 104038 from Senegal (designated as WK21) was kindly provided by the  
437 International Rice Germplasm Center of the International Rice Research Institute  
438 (Philippines) and conserved at Kyushu University. Nipponbare (Nip) was used as the pollen

439 parent. Callus induction from AC was carried out according to Kanaoka et al. (2018) and is  
440 described as follows. After sterilization with 70% ethanol, panicles with spikelets at the  
441 booting stage (uninucleate stage) were incubated at 10°C (low temperature treatment) in the  
442 dark for 4 to 10 days. Approximately 70 anthers per dish were plated onto RI-13 callus-  
443 induction medium (Woo et al., 1978) prepared in a  $\varnothing$  90 mm  $\times$  H 15 mm plastic dish. The  
444 plated anthers were then cultured at 25°C in the dark for 4 months. Grown calli were  
445 transplanted to fresh medium to promote further growth. To induce plant regeneration, calli  
446 grown to a diameter of 2 mm were moved to N6 medium (Chu, 1978) and incubated under  
447 light conditions at 25°C. When plantlets developed and roots emerged in the medium, the  
448 plantlets were transplanted to sterile soil, which included equal amounts of peat moss,  
449 vermiculite, and compost. The rice plants were grown under shade conditions in the  
450 greenhouse.

451

#### 452 **Pollen observation**

453 The anthers for pollen observation were collected based on a distance between the auricles  
454 of flag leaf and penultimate leaf. To estimate microspore stages, microspore was collected  
455 when then the two auricles were separated by the following distances: -1.0 to +1.0 cm for  
456 the uninucleate stage and +2.0 to +6.0 cm for the binucleate state. In addition, mature  
457 pollen was collected after heading. These distances were almost all the same among the  
458 plant materials used. Collected anthers were fixed with formalin-acetic acid-alcohol  
459 fixative and then prepared for microscopic observation. For observation at each microspore  
460 developmental stage, anthers were squashed on a microscope slide. After addition of 10  $\mu$ l  
461 acetocarmine or Lugol's iodine staining solution, the slide was covered with a cover slip  
462 and observed to respectively determine the pollen developmental stage or fertility of mature  
463 pollen.

464

#### 465 **Chromosome counting**

466 For chromosome number estimation, mitosis was observed using cells from root tips of  
467 regenerated plant #20, which were pretreated using 2 mM 8-hydroxyquinoline for 2 to 2.5 h

468 at 20°C. After fixation, 1 mm of each root tip was cut off and macerated in enzyme solution  
469 consisting of 6.0% (w/v) Cellulase Onozuka RS (Yakult Pharmaceutical, Tokyo, Japan),  
470 6.0% (w/v) Pectolyase Y-23 (Kyowa Chemical Products, Kagawa, Japan), and 75 mM KCl  
471 for 60 min at 37°C. The root tips were washed with a drop of distilled water for 5 min on a  
472 glass slide. To spread cells, each root tip was thoroughly squashed using a needle with 10  
473 µl ethanol-acetic acid [3:1 (v/v)], and the slide was then flame-dried. The spread cells were  
474 stained for 30 min with Giemsa solution (Kanto Chemical Co. INC., Tokyo, Japan) diluted  
475 30 times with Sorensen's phosphate buffer (pH 6.8). After washing with distilled water, the  
476 number of chromosomes was counted under an optical microscope (Olympus BX-50 F,  
477 Olympus, Tokyo, Japan).

478

#### 479 **Ploidy analysis**

480 Ploidy levels of materials were examined by measuring relative nuclear DNA amounts by  
481 flow cytometry as described in Miyashita et al. (2011). Nuclear suspensions obtained by  
482 extraction of small pieces of leaf tissue with nuclear extraction buffer (Quantum Stain NA  
483 2A, CytoTechs, Ibaraki, Japan) were filtered through a 30-µm nylon mesh (Partec Celltrics,  
484 Lincolnshire, IL, USA). The fluorescent intensity of nuclei stained with DAPI (pH 7.5) was  
485 measured using a flow cytometer (Partec PA, Partec GmbH, Münster, Germany). The  
486 ploidy level of each examined individual was estimated using the fluorescent intensity of  
487 diploid tissue as a standard.

488

#### 489 **Genotyping**

490 PCR detection of polymorphisms between WK21 and Nip was based on comparison of  
491 their complete genome sequences. The complete genome sequence of Nip was obtained  
492 from IRGSP-1.0 (RAP-DB), while that of WK21 was sequenced and deposited into the  
493 DDBJ under accession number DRS049718. Genomic DNA of regenerated plants from  
494 WK21/Nip F<sub>1</sub> individuals were extracted from mature leaves of well-grown regenerants.  
495 For genotyping of regenerated plants, we used 57 markers designed using SSR or InDel  
496 polymorphisms between WK21 and Nip (Supplemental Fig. 2). Among the 57 markers, 22

497 were randomly distributed on each of 12 chromosomes (McCouch et al., 2002), and 24  
498 were located near the centromere of each chromosome. Each centromere location was  
499 based on the Rice Genome Annotation Project database  
500 (<http://rice.plantbiology.msu.edu/cgi-bin/gbrowse/rice/>). In addition, 12 markers linked to  
501 *HS* loci were used to test zygoty. PCR amplifications for genotyping were performed  
502 using GoTaq Green Master Mix (Promega, Madison, WI, USA), with the resulting products  
503 subjected to 3% agarose gel electrophoresis (Supplemental Fig. S3). Three genotyping  
504 analyses were independently performed.

505

### 506 **Immunohistochemical staining**

507 Samples were soaked for 20 min in a fixative consisting of microtubule-stabilizing buffer  
508 (5 mM PIPES, 0.5 mM MgSO<sub>4</sub>, and 0.5 mM EGTA, pH 7.0) containing 3% (w/v)  
509 paraformaldehyde and 0.1% (v/v) Triton X-100 and then rinsed twice in 1× PBS buffer for  
510 10 min. In the primary reaction, two primary antibodies were used: anti-OsCenH3 rabbit  
511 antibody and anti- $\alpha$ -tubulin mouse antibody (T6199, Sigma-Aldrich, St. Louis, MO, USA)  
512 (Nagaki et al., 2004). A primary antibody solution containing the two antibodies was  
513 diluted 200 times with a blocking buffer [0.4 M Tris-HCl (pH 7.5), 3.5% (w/v) NaCl, and  
514 2% (w/v) BSA]. Fixed anthers were gently dissected on a glass slide using tweezers. Cells  
515 from the dissected anthers were suspended in 20  $\mu$ l of 1× PBS, and covered with a  
516 coverslip, and then stored in a freezer (−80°C). After freezing, the coverslip was removed,  
517 100  $\mu$ l of the primary antibody solution was applied, and the solution was covered by a  
518 piece of parafilm (55 × 26 mm) to spread the solution. The samples were placed in a  
519 moisture chamber to prevent drying and kept at 4°C for 14 h. After the primary reaction,  
520 the samples were rinsed three times with 1× PBS for 10 min. Two secondary antibodies  
521 were used: Alexa Fluor 488-labeled anti-mouse antibody (#A-11001: Invitrogen, Carlsbad,  
522 CA, USA) and Alexa Fluor 555-labeled anti-rabbit antibody (#A20739: Invitrogen). The  
523 secondary antibody solution was diluted 200 times with the same blocking buffer used in  
524 the primary reaction. After the washing, the PBS buffer was removed from the slides, and  
525 then 100  $\mu$ l of secondary antibody solution was applied, and the solution was covered by a

526 piece of parafilm. The slides were placed in a moisture chamber and incubated at 37°C for  
527 1 h. After the secondary reaction, the samples were rinsed using the same procedure applied  
528 after the primary reaction and then dried. To stain DNAs with minimal fading, 20 µl of  
529 ProLong Diamond Antifade Mountant with DAPI (Invitrogen) was applied to each slide  
530 before observation.

531

### 532 **Acknowledgments**

533 We are grateful for the help of Dr. S. Ishiguro, Mr. Y. Ota, and Ms. R. Iwashiro  
534 (Laboratory of Plant Breeding, Hokkaido University) in conducting this study. We also  
535 thank Dr. N. Ohmido (Graduate School of Human Development and Environment, Kobe  
536 University) for valuable technical advice. We thank Edanz Group  
537 ([www.edanzediting.com/ac](http://www.edanzediting.com/ac)) for editing the English text of a draft of this manuscript.

538



539

Table 1 Genotyping of the 12 HS loci in the 17 regenerated plants

| HS locus                  | #13 | #19 | #63 | #70 | #91 | #39 | #79 | #88 | #16 | #20 | #25 | #28 | #38 | #47 | #74 | #80 | #96 |
|---------------------------|-----|-----|-----|-----|-----|-----|-----|-----|-----|-----|-----|-----|-----|-----|-----|-----|-----|
| <i>S</i> <sub>1</sub>     | H   | H   | H   | W   | H   | H   | H   | H   | H   | H   | H   | H   | H   | H   | H   | H   | W   |
| <i>S</i> <sub>3</sub>     | H   | H   | H   | N   | W   | H   | H   | H   | N   | H   | H   | N   | H   | W   | H   | H   | W   |
| <i>S</i> <sub>18</sub>    | H   | H   | H   | W   | N   | H   | H   | H   | H   | H   | H   | W   | H   | H   | H   | N   | W   |
| <i>S</i> <sub>19</sub>    | H   | H   | H   | N   | W   | H   | H   | H   | H   | H   | H   | H   | H   | H   | N   | W   | W   |
| <i>S</i> <sub>20</sub>    | H   | H   | W   | H   | N   | H   | H   | H   | H   | H   | H   | H   | H   | H   | N   | H   | N   |
| <i>S</i> <sub>21</sub>    | H   | H   | N   | W   | N   | H   | H   | H   | H   | N   | W   | H   | H   | H   | N   | H   | N   |
| <i>S</i> <sub>29(t)</sub> | H   | H   | H   | H   | H   | H   | H   | H   | H   | H   | H   | H   | H   | H   | N   | N   | W   |
| <i>S</i> <sub>34(t)</sub> | H   | W   | N   | H   | W   | H   | H   | H   | W   | H   | N   | H   | H   | H   | H   | H   | N   |
| <i>S</i> <sub>36(t)</sub> | H   | H   | H   | H   | H   | H   | H   | H   | H   | H   | H   | H   | H   | H   | H   | H   | W   |
| <i>S</i> <sub>37(t)</sub> | H   | H   | H   | W   | N   | H   | H   | H   | W   | H   | H   | W   | H   | H   | H   | H   | N   |
| <i>S</i> <sub>38(t)</sub> | H   | H   | H   | W   | H   | H   | H   | H   | N   | N   | H   | W   | H   | H   | H   | H   | N   |
| <i>S</i> <sub>39(t)</sub> | H   | N   | H   | H   | N   | H   | H   | H   | H   | N   | N   | H   | H   | N   | H   | N   | N   |
| Collected seeds no.       | 0   | 0   | 0   | 0   | 0   | 0   | 0   | 0   | 0   | 2   | 4   | 0   | 18  | 1   | 0   | 32  | 0   |
| Ploidy                    | 2x  | 2x  | 2x  | 2x  | 2x  | 3x  | 3x  | 3x  | 4x  | 4x  | 4x  | 4x  | 4x  | 4x  | 5x  | 4x  | 4x  |

The details of markers located in the centromeric regions used in this analysis are listed in SI Appendix, Fig. S1. Except for a Hom plant #96, the 12 Hom/Het plants and five Het plants possess the HS loci as partly and completely heterozygous states, respectively. "N", "W", and "H" in the table show homozygous of *O. sativa* (Nip) allele, homozygous of *O. glaberrima* (WK21) allele, and their heterozygous allele, respectively. The number of collected seeds and ploidy of each regenerated plant are indicated below. Five fertile plants highlighted with gray had seeds, which were all tetraploid.

540

541

542

543

Table 2 The features of the progenies (RP2-25, -38, -80) from the fertile regenerated plants, 25, 38, and 80, respectively

| Plant materials     | Seed size <sup>2</sup> (mm) |         | Seed size <sup>3</sup> (mm) |         | Plant height (cm) | Leaf length (cm) |                      |          |          | Leaf breadth (cm) |           |           |           | Ligule length (cm) |           |           | Color of pistils |                 |
|---------------------|-----------------------------|---------|-----------------------------|---------|-------------------|------------------|----------------------|----------|----------|-------------------|-----------|-----------|-----------|--------------------|-----------|-----------|------------------|-----------------|
|                     | Length                      | Width   | Length                      | Width   |                   | Flag leaf        | Flag -1 <sup>4</sup> | Flag -2  | Flag -3  | Flag leaf         | Flag -1   | Flag -2   | Flag -3   | Flag leaf          | Flag -1   | Flag -2   |                  | Flag -3         |
| <sup>1</sup> RP2-25 | n. d.                       |         | n. d.                       |         | 122.9±6.6         | 28.0±7.7         | 59.0±13.2            | 77.7±8.6 | 81.6±4.2 | 2.13±0.07         | 1.71±0.09 | 1.47±0.13 | 1.50±0.07 | 0.65±0.16          | 1.97±0.42 | 3.43±1.08 | 2.94±0.86        | Blackish purple |
| RP2-38              | n. d.                       |         | 8.7±0.5                     | 2.9±0.3 | 130.7±13.9        | 26.7±14.2        | 55.6±21.1            | 78.5±8.8 | 81.5±8.7 | 1.94±0.25         | 1.56±0.29 | 1.51±0.13 | 1.49±0.11 | 0.82±0.29          | 1.63±0.34 | 2.62±0.67 | 2.58±0.41        | Blackish purple |
| RP2-80              | 9.1±0.5                     | 3.6±0.3 | 9.0±0.2                     | 4.0±0.3 | 120.3±3           | 16.3±8.4         | 43.4±7.3             | 75.1±5.7 | 78.8±6.8 | 1.64±0.61         | 1.86±0.26 | 1.87±0.10 | 1.67±0.16 | 0.47±0.14          | 0.96±0.29 | 1.70±0.31 | 1.52±0.21        | White           |
| Nipponbare          | 6.4±0.4                     | 2.7±0.2 | -                           | -       | 97.9              | 18.4             | 33.2                 | 56.7     | 69.5     | 1.45              | 1.43      | 1.30      | 1.20      | 0.40               | 0.85      | 1.00      | 1.30             | White           |
| WK21                | 6.8±0.4                     | 2.6±0.3 | -                           | -       | 115.1             | 18.6             | 40.2                 | 69.2     | 61.3     | 1.60              | 1.40      | 1.25      | 1.45      | 0.40               | 0.50      | 0.55      | 0.70             | Blackish purple |

<sup>1</sup>RP2 is the next generation of the regenerated plants from AC. <sup>2</sup>The seeds were ones (RP2) from the fertile regenerated plants. <sup>3</sup>The seeds were ones (RP3) from the seeds of the progeny (RP2) of the regenerated plants. <sup>4</sup>Flag -1, Flag -2, and Flag -3 mean one, two, and three leaves previous to the flag leaf emerged, respectively.

544  
545

546  
547

548

549 **Figure legends**

550 Fig. 1

551 Images of microspores at different developmental stages in Nip, WK21, and WK21/Nip F<sub>1</sub>  
552 plants.

553 (A) Panicles and pollen grains of Nip, WK21, and WK21/Nip F<sub>1</sub> plants. Mature panicles  
554 were observed in individuals of Nip, WK21, and their interspecific F<sub>1</sub> hybrid (WK21/Nip  
555 F<sub>1</sub>) at the ripening stage. Panicles in Nip and WK21 were fertile, while the panicle in  
556 WK21/Nip F<sub>1</sub> was sterile. Awns developed in the interspecific F<sub>1</sub> hybrid (white arrows) but  
557 not in the parents. All plant materials used for experiments were grown in a greenhouse.  
558 Pollen grains from Nip and WK21, which were stainable with Lugol's iodine solution,  
559 exhibited potential fertility, whereas pollen from WK21/Nip F<sub>1</sub> was sterile, as reflected by  
560 the absence of staining.

561 (B) Microspores at early uninucleate, late uninucleate, binucleate, and trinucleate stages.  
562 Microspores were stained with acetocarmine. The black bar in each panel corresponds to  
563 100 μm. WK21/Nip F<sub>1</sub> plants at the early uninucleate stage seemed to contain mostly  
564 normal microspores. The number of abnormal microspores increased as development  
565 progressed until most pollen grains appeared cavitated.

566 (C) Abnormal microspores in WK21/Nip F<sub>1</sub> plants at the early uninucleate stage.  
567 Microspores were stained with acetocarmine. Black arrows indicate abnormally shaped  
568 microspores. The black bar in each panel corresponds to 100 μm.

569

570 Fig. 2

571 Characteristics of the 19 regenerated plants.

572 (A) Genotypes of 19 plants regenerated from the calli of WK21/Nip F<sub>1</sub> hybrids. The  
573 markers used for genotyping—one or two selected from each of 12 chromosomes—are  
574 detailed in Supplemental Fig. S2. Two regenerated plants, #60 and #96, were homozygous  
575 in all marker regions (Hom). The next 12 regenerated plants contained both homozygous  
576 and heterozygous regions (Hom/Het). The five plants on the far right-hand side were

577 determined to be heterozygous (Het). At each marker position, the presence of two *Oryza*  
578 *sativa* (Nip) alleles, two *O. glaberrima* (WK21) alleles, or one copy of each (heterozygous)  
579 is indicated in the table by “N”, “W”, and “H”, respectively. The state of the leaf surface  
580 [rough (R) or smooth (S)] and the presence (yes) or absence (no) of awns (Fig. 1A) are also  
581 indicated.

582 (B) Leaf surfaces of Nip, WK21, and WK21/Nip F<sub>1</sub> plants. Surfaces of adaxial sides of Nip  
583 and F<sub>1</sub> leaves were rough because trichomes were present (black arrows), whereas those of  
584 WK21 were smooth because trichomes were lacking.

585

586 Fig. 3

587 Ploidy analyses of somatic cells of regenerated plants based on flow cytometry (FCM) and  
588 Giemsa staining.

589 (A) FCM-based ploidy analysis. Left: FCM histogram of samples of Nip and plant #20  
590 showing two peaks—N (derived from the Nip genome) and X (derived from the #20  
591 genome). Right: FCM histogram showing two peaks—W (from WK21) and X. The ploidy  
592 level of #20 was determined by comparing peak X with peaks N and W from the diploid  
593 parental lines. The relative fluorescence intensity of the peak of #20 was nearly twice as  
594 high as that of the two parents.

595 (B) Ploidy levels of regenerated plants estimated from fluorescence intensity peak ratios.  
596 Ploidy levels of regenerated plants were based on relative fluorescence intensities of nuclei  
597 in Nip and WK21 cells. Diploid ploidy levels estimated by this method were validated by  
598 comparison with regenerated plant #28, which was determined to be tetraploid.

599 (C) Giemsa staining of mitotic cells. Left: mitotic cell from the root tip of a WK21/Nip F<sub>1</sub>  
600 plant. The number of chromosomes in the cell appears to be a half that of a #20 plant.  
601 Right: mitotic cell from the root tip of a #20 plant regenerated from WK21/Nip F<sub>1</sub>. More  
602 than 40 chromosomes are visible.

603

604 Fig. 4

605 Meiotic anomalies associated with FDR and SDR in WK21/Nip F<sub>1</sub>.

606 (A) Schematic diagram of chromosomal separations following normal, FDR, and SDR  
607 meiotic events. The three different chromosomal separation pathways following normal,  
608 FDR, and SDR events during meiotic division are based on De Storme and Geelen (2013).  
609 In the normal situation, bivalent homologous chromosomes separate after recombination at  
610 the end of meiosis I, with the sister chromatids remaining attached at the beginning of  
611 meiosis II and then separating. In FDR, homologous chromosomes fail to separate at the  
612 end of meiosis I, resulting in homologous chromosomes in the gametes. SDR bypasses  
613 meiosis II, and sister chromatids are distributed into gametes. FDR and SDR lead to  
614 centromeric regions (shown as knobs) that are respectively heterozygous or homozygous  
615 between homologous chromosomes. Red and blue are used to indicate the parental origin of  
616 chromosomal regions.

617 (B) Genetic zygosities of centromeric regions of the 12 chromosomes of 12 regenerated  
618 plants and detection of FDR and SDR. Markers in centromeric regions used in this analysis  
619 are detailed in Supplemental Fig. S2. The 12 regenerated Hom/Het plants retaining both  
620 homozygous and heterozygous regions constitute two groups: those with completely  
621 heterozygous centromeric regions (#13 to #80) and those with completely homozygous  
622 ones (#16 to #91). The former group reflects the genetic nature of FDR, while the latter  
623 group is indicative of SDR. In the table, the presence at a given marker position of two *O.*  
624 *sativa* (Nip) alleles, two *O. glaberrima* (WK21) alleles, or one allele of each (heterozygous)  
625 is indicated by “N”, “W”, and “H”, respectively.

626 (C) Immunohistochemical detection of normal and anomalous gametes during meiosis I in  
627 WK21/Nip F<sub>1</sub>. Using anti-OsCenH3 antibody, centromeric regions were observed in  
628 chromosomes at diplotene in meiosis I in PMCs from WK21/Nip F<sub>1</sub>. Left: detection of  
629 paired signals (red spots) from centromeres at diplotene in a PMC, implying normal  
630 bivalent chromosomes (white portions). Right: non-aligned, dispersed centromeric signals,  
631 indicative of univalent chromosomes.

632 (D) Immunohistochemical detection of normal and anomalous gametes during meiosis II of  
633 WK21/Nip F<sub>1</sub>. Using anti- $\alpha$ -tubulin mouse antibody, spindle fiber formation (green zone)  
634 was observed at anaphase II in PMCs from WK21/Nip F<sub>1</sub>. During normal anaphase II,

635 sister chromatids (white zone) prepared to move toward opposite poles of the cell to  
636 generate haploid gametes. Left: normal division, showing movement of sister chromatids to  
637 the poles via the spindle fibers in both compartments as monitored using  $\alpha$ -tubulin antibody.  
638 Right: unequal division in a PMC. In the upper compartment, no  $\alpha$ -tubulin was observed,  
639 and sister chromatids were unable to separate and move to the poles; in contrast, the  
640 movement of sister chromatids along spindle fibers was apparent in the lower compartment.

641

642 Fig. 5

643 Models of processes of hybrid sterility and its circumvention.

644 (A) A new model of hybrid sterility and plant regeneration by AC during microspore  
645 development in WK21/Nip F<sub>1</sub>. Meiotic aberrations are proposed as a cause of hybrid  
646 sterility. The parental varieties, WK21 and Nip, undergo normal microspore development  
647 to form pollen. In contrast, microspores of WK21/Nip F<sub>1</sub> do not develop into pollen  
648 because of HS due to 1) meiotic aberrations and 2) allelic interactions at *HS* loci.

649 (B) Higher rates of fertile gametes in tetraploids compared with diploids according to the  
650 killer–protector model. Under the killer–protector model of HS, the killer protein has a  
651 sporophytic effect on gametes during microspore development after meiosis, but the gamete  
652 expressing the protector protein is not killed. In the case of a heterozygous tetraploid plant,  
653 which contains two killer–protector alleles and two killed alleles, three-quarters of the  
654 gametes possess protector alleles. In the case of a heterozygous diploid plant, only half of  
655 the gametes carry a killer–protector allele. In theory, a heterozygous tetraploid thus  
656 produces 25% more surviving gametes than does a heterozygous diploid plant.

657

658

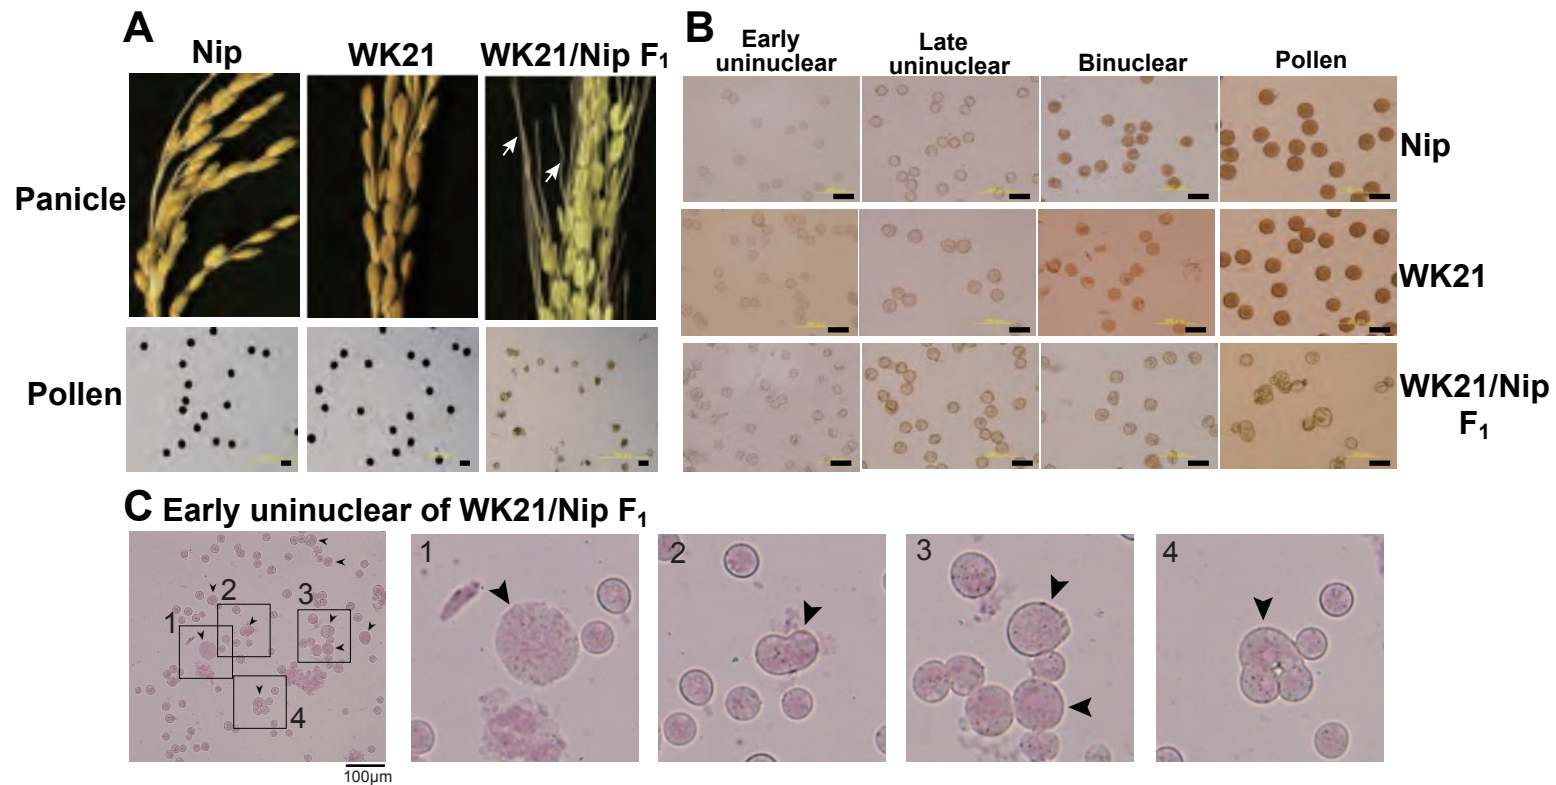

Fig. 1

Images of microspores at different developmental stages in Nip, WK21, and WK21/Nip F<sub>1</sub> plants.

(A) Panicles and pollen grains of Nip, WK21, and WK21/Nip F<sub>1</sub> plants. Mature panicles were observed in individuals of Nip, WK21, and their interspecific F<sub>1</sub> hybrid (WK21/Nip F<sub>1</sub>) at the ripening stage. Panicles in Nip and WK21 were fertile, while the panicle in WK21/Nip F<sub>1</sub> was sterile. Awns developed in the interspecific F<sub>1</sub> hybrid (white arrows) but not in the parents. All plant materials used for experiments were grown in a greenhouse. Pollen grains from Nip and WK21, which were stainable with Lugol' s iodine solution, exhibited potential fertility, whereas pollen from WK21/Nip F<sub>1</sub> was sterile, as reflected by the absence of staining.

(B) Microspores at early uninucleate, late uninucleate, binucleate, and trinucleate stages. Microspores were stained with acetocarmine. The black bar in each panel corresponds to 100 µm. WK21/Nip F<sub>1</sub> plants at the early uninucleate stage seemed to contain mostly normal microspores. The number of abnormal microspores increased as development progressed until most pollen grains appeared cavitated.

(C) Abnormal microspores in WK21/Nip F<sub>1</sub> plants at the early uninucleate stage. Microspores were stained with acetocarmine. Black arrows indicate abnormally shaped microspores. The black bar in each panel corresponds to 100 µm.



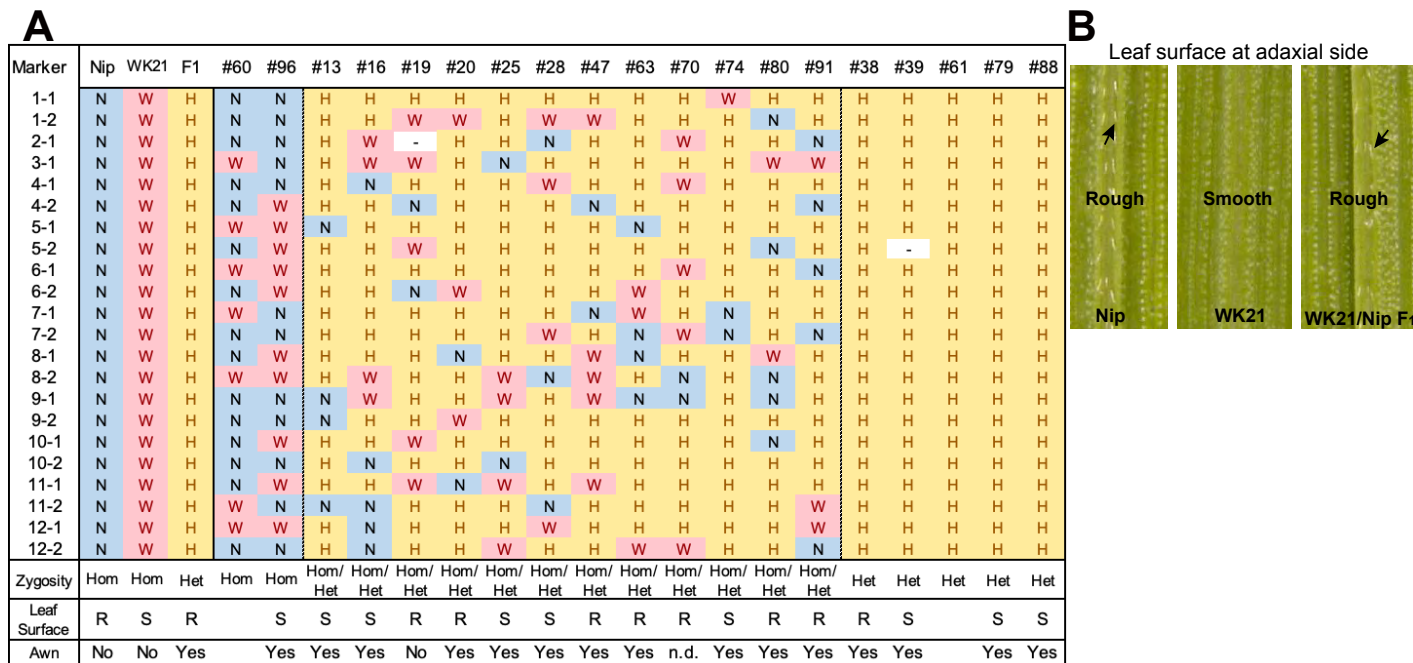

Fig. 2

Characteristics of the 19 regenerated plants.

(A) Genotypes of 19 plants regenerated from the calli of WK21/Nip F1 hybrids. The markers used for genotyping—one or two selected from each of 12 chromosomes—are detailed in Supplemental Fig. S2. Two regenerated plants, #60 and #96, were homozygous in all marker regions (Hom). The next 12 regenerated plants contained both homozygous and heterozygous regions (Hom/Het). The five plants on the far right-hand side were determined to be heterozygous (Het). At each marker position, the presence of two *Oryza sativa* (Nip) alleles, two *O. glaberrima* (WK21) alleles, or one copy of each (heterozygous) is indicated in the table by “N”, “W”, and “H”, respectively. The state of the leaf surface [rough (R) or smooth (S)] and the presence (yes) or absence (no) of awns (Fig. 1A) are also indicated.

(B) Leaf surfaces of Nip, WK21, and WK21/Nip F1 plants. Surfaces of adaxial sides of Nip and F1 leaves were rough because trichomes were present (black arrows), whereas those of WK21 were smooth because trichomes were lacking.

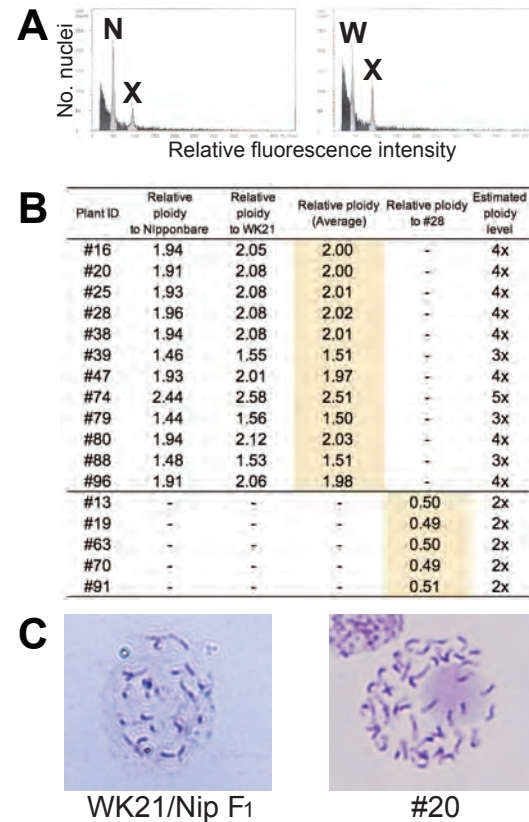

Fig. 3

Ploidy analyses of somatic cells of regenerated plants based on flow cytometry (FCM) and Giemsa staining.

(A) FCM-based ploidy analysis. Left: FCM histogram of samples of Nip and plant #20 showing two peaks—N (derived from the Nip genome) and X (derived from the #20 genome). Right: FCM histogram showing two peaks—W (from WK21) and X. The ploidy level of #20 was determined by comparing peak X with peaks N and W from the diploid parental lines. The relative fluorescence intensity of the peak of #20 was nearly twice as high as that of the two parents.

(B) Ploidy levels of regenerated plants estimated from fluorescence intensity peak ratios. Ploidy levels of regenerated plants were based on relative fluorescence intensities of nuclei in Nip and WK21 cells. Diploid ploidy levels estimated by this method were validated by comparison with regenerated plant #28, which was determined to be tetraploid.

(C) Giemsa staining of mitotic cells. Left: mitotic cell from the root tip of a WK21/Nip F1 plant. The number of chromosomes in the cell appears to be a half that of a #20 plant. Right: mitotic cell from the root tip of a #20 plant regenerated from WK21/Nip F1. More than 40 chromosomes are visible.

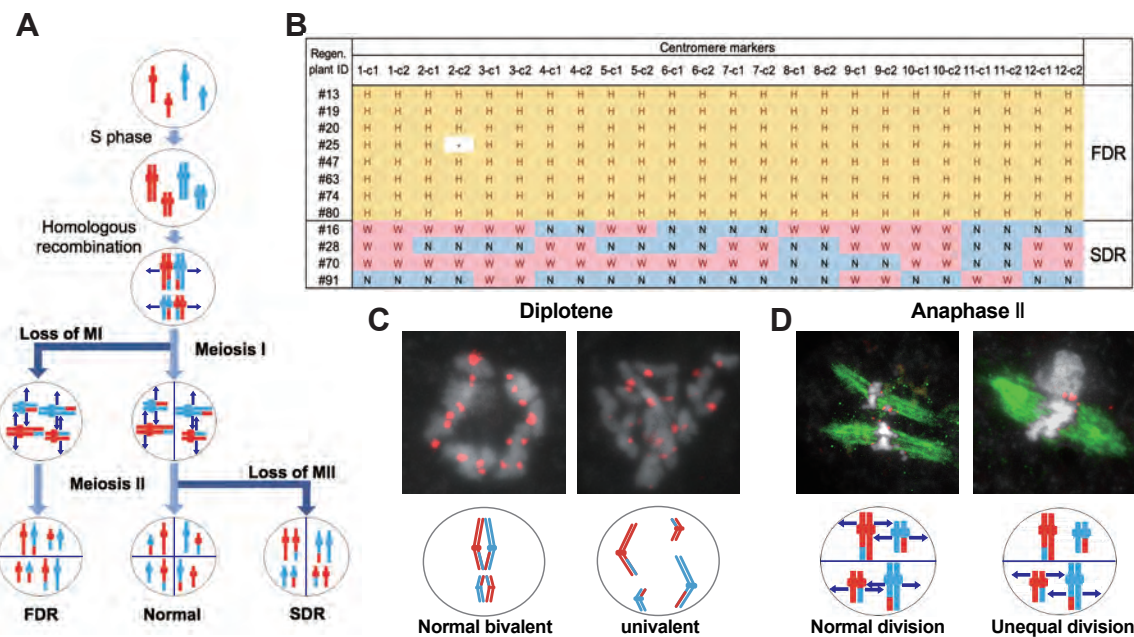

Fig. 4

Meiotic anomalies associated with FDR and SDR in WK21/Nip F1.

(A) Schematic diagram of chromosomal separations following normal, FDR, and SDR meiotic events. The three different chromosomal separation pathways following normal, FDR, and SDR events during meiotic division are based on De Storme and Geelen (2013). In the normal situation, bivalent homologous chromosomes separate after recombination at the end of meiosis I, with the sister chromatids remaining attached at the beginning of meiosis II and then separating. In FDR, homologous chromosomes fail to separate at the end of meiosis I, resulting in homologous chromosomes in the gametes. SDR bypasses meiosis II, and sister chromatids are distributed into gametes. FDR and SDR lead to centromeric regions (shown as knobs) that are respectively heterozygous or homozygous between homologous chromosomes. Red and blue are used to indicate the parental origin of chromosomal regions.

(B) Genetic zygosity of centromeric regions of the 12 chromosomes of 12 regenerated plants and detection of FDR and SDR. Markers in centromeric regions used in this analysis are detailed in Supplemental Fig. S2. The 12 regenerated Hom/Het plants retaining both homozygous and heterozygous regions constitute two groups: those with completely heterozygous centromeric regions (#13 to #80) and those with completely homozygous ones (#16 to #91). The former group reflects the genetic nature of FDR, while the latter group is indicative of SDR. In the table, the presence at a given marker position of two *O. sativa* (Nip) alleles, two *O. glaberrima* (WK21) alleles, or one allele of each (heterozygous) is indicated by "N", "W", and "H", respectively.

(C) Immunohistochemical detection of normal and anomalous gametes during meiosis I in WK21/Nip F1. Using anti-OsCenH3 antibody, centromeric regions were observed in chromosomes at diplotene in meiosis I in PMCs from WK21/Nip F1. Left: detection of paired signals (red spots) from centromeres at diplotene in a PMC, implying normal bivalent chromosomes (white portions). Right: non-aligned, dispersed centromeric signals, indicative of univalent chromosomes.

(D) Immunohistochemical detection of normal and anomalous gametes during meiosis II of WK21/Nip F1. Using anti- $\alpha$ -tubulin mouse antibody, spindle fiber formation (green zone) was observed at anaphase II in PMCs from WK21/Nip F1. During normal anaphase II, sister chromatids (white zone) prepared to move toward opposite poles of the cell to generate haploid gametes. Left: normal division, showing movement of sister chromatids to the poles via the spindle fibers in both compartments as monitored using  $\alpha$ -tubulin antibody. Right: unequal division in a PMC. In the upper compartment, no  $\alpha$ -tubulin was observed, and sister chromatids were unable to separate and move to the poles; in contrast, the movement of sister chromatids along spindle fibers was apparent in the lower compartment.

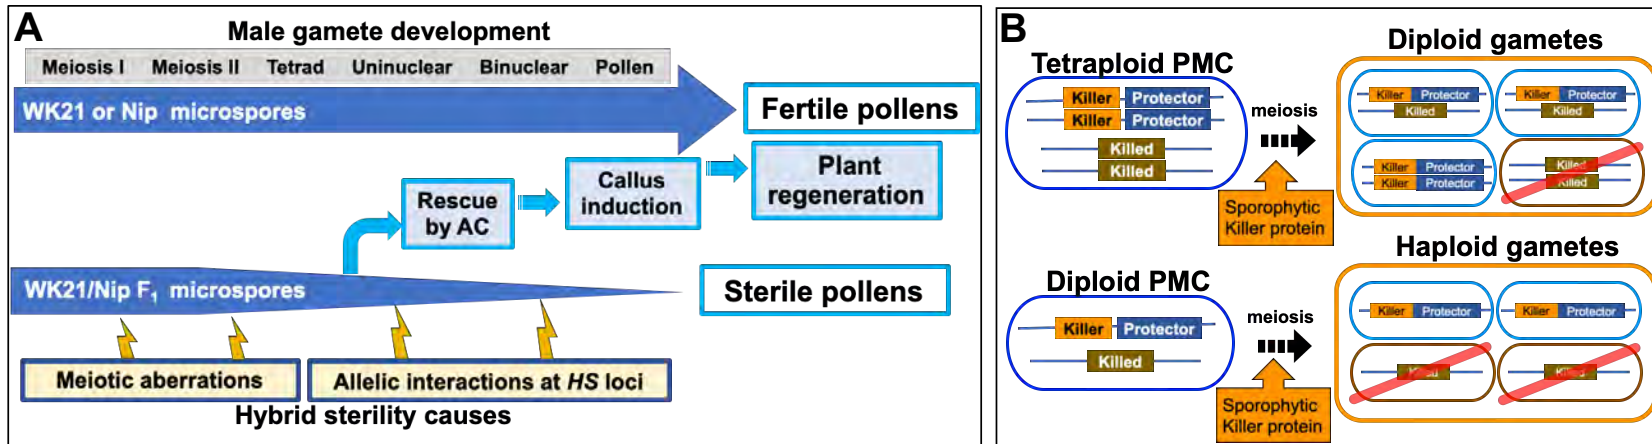

Fig. 5  
 Models of processes of hybrid sterility and its circumvention.  
 (A) A new model of hybrid sterility and plant regeneration by AC during microspore development in WK21/Nip F<sub>1</sub>. Meiotic aberrations are proposed as a cause of hybrid sterility. The parental varieties, WK21 and Nip, undergo normal microspore development to form pollen. In contrast, microspores of WK21/Nip F<sub>1</sub> do not develop into pollen because of HS due to 1) meiotic aberrations and 2) allelic interactions at HS loci.  
 (B) Higher rates of fertile gametes in tetraploids compared with diploids according to the killer–protector model. Under the killer–protector model of HS, the killer protein has a sporophytic effect on gametes during microspore development after meiosis, but the gamete expressing the protector protein is not killed. In the case of a heterozygous tetraploid plant, which contains two killer–protector alleles and two killed alleles, three-quarters of the gametes possess protector alleles. In the case of a heterozygous diploid plant, only half of the gametes carry a killer–protector allele. In theory, a heterozygous tetraploid thus produces 25% more surviving gametes than does a heterozygous diploid plant.

## Parsed Citations

- Chu CC (1978) The N6 medium and its applications to anther culture of cereal crops. In Proceedings of Symposium on Plant Tissue Culture. Science Press, Peking, pp 43-50**  
Pubmed: [Author and Title](#)  
Google Scholar: [Author Only](#) [Title Only](#) [Author and Title](#)
- De Storme N, Geelen D (2013) Sexual polyploidization in plants--cytological mechanisms and molecular regulation. New Phytol 198: 670-684**  
Pubmed: [Author and Title](#)  
Google Scholar: [Author Only](#) [Title Only](#) [Author and Title](#)
- Doi K, Taguchi H, Yoshimura A (1999) RFLP mapping of S20 and S21 for F1 pollen semi-sterility found in backcross progeny of *Oryza sativa* and *O. glaberrima*. Rice Genetics Newsletter 16: 65-68**  
Pubmed: [Author and Title](#)  
Google Scholar: [Author Only](#) [Title Only](#) [Author and Title](#)
- Doi K, Taguchi K, Yoshimura A (1998) A new locus affecting high F1 pollen sterility found in backcross progenies of Japonica rice and African rice. Rice Genetics Newsletter 15: 146-147**  
Pubmed: [Author and Title](#)  
Google Scholar: [Author Only](#) [Title Only](#) [Author and Title](#)
- Garavito A, Guyot R, Lozano J, Gavory F, Samain S, Panaud O, Tohme J, Ghesquiere A, Lorieux M (2010) A genetic model for the female sterility barrier between Asian and African cultivated rice species. Genetics 185: 1425-1440**  
Pubmed: [Author and Title](#)  
Google Scholar: [Author Only](#) [Title Only](#) [Author and Title](#)
- Gopalakrishnan R, Nayar NM, Sampath S (1964) Cytogenetical studies of two amphidiploids in the genus *Oryza*. Euphytica 13: 57-64**  
Pubmed: [Author and Title](#)  
Google Scholar: [Author Only](#) [Title Only](#) [Author and Title](#)
- Grewal D, Manito C, Bartolome V (2011) Doubled Haploids Generated through Anther Culture from Crosses of Elite Indica and Japonica Cultivars and/or Lines of Rice: Large-Scale Production, Agronomic Performance, and Molecular Characterization. Crop Sci 51: 2544-2553**  
Pubmed: [Author and Title](#)  
Google Scholar: [Author Only](#) [Title Only](#) [Author and Title](#)
- Gribaudo I, Gambino G, Vallania R (2004) Somatic embryogenesis from grapevine anthers: The optimal developmental stage for collecting explants. Am J Enol Viticult 55: 427-430**  
Pubmed: [Author and Title](#)  
Google Scholar: [Author Only](#) [Title Only](#) [Author and Title](#)
- Han ZQ, Geng XN, Du K, Xu CP, Yao PQ, Bai FY, Kang XY (2018) Analysis of genetic composition and transmitted parental heterozygosity of natural 2n gametes in *Populus tomentosa* based on SSR markers. Planta 247: 1407-1421**  
Pubmed: [Author and Title](#)  
Google Scholar: [Author Only](#) [Title Only](#) [Author and Title](#)
- Hassawi DS, Liang GH (1990) Effect of Cultivar, Incubation-Temperature, and Stage of Microspore Development on Anther Culture in Wheat and Triticale. Plant Breeding 105: 332-336**  
Pubmed: [Author and Title](#)  
Google Scholar: [Author Only](#) [Title Only](#) [Author and Title](#)
- Hoekstra S, Vanzijderveld MH, Louwerse JD, Heidekamp F, Vandermark F (1992) Anther and Microspore Culture of *Hordeum Vulgare* L Cv Igri. Plant Science 86: 89-96**  
Pubmed: [Author and Title](#)  
Google Scholar: [Author Only](#) [Title Only](#) [Author and Title](#)
- Huang N, Parco A, Mew T, Magpantay G, McCouch S, Guiderdoni E, Xu JC, Subudhi P, Angeles ER, Khush GS (1997) RFLP mapping of isozymes, RAPD and QTLs for grain shape, brown planthopper resistance in a doubled haploid rice population. Molecular Breeding 3: 105-113**  
Pubmed: [Author and Title](#)  
Google Scholar: [Author Only](#) [Title Only](#) [Author and Title](#)
- Jauhar PP (2007) Meiotic restitution in wheat polyploids (Amphihaploids): A potent evolutionary force. J Hered 98: 188-193**  
Pubmed: [Author and Title](#)  
Google Scholar: [Author Only](#) [Title Only](#) [Author and Title](#)
- Jones MP, Dingkuhn M, Aluko GK, Semon M (1997) Interspecific *Oryza sativa* L X *O. glaberrima* Steud progenies in upland rice improvement. Euphytica 94: 237-246**  
Pubmed: [Author and Title](#)



Google Scholar: [Author Only](#) [Title Only](#) [Author and Title](#)

**Kanaoka Y, Kuniyoshi D, Inada E, Koide Y, Okamoto Y, Yasui H, Kishima Y (2018) Anther culture in rice proportionally rescues microspores according to gametophytic gene effect and enhances genetic study of hybrid sterility. Plant Methods 14**

Pubmed: [Author and Title](#)

Google Scholar: [Author Only](#) [Title Only](#) [Author and Title](#)

**Kinoshita A, Okamoto Y, Ishimura S, Satake T (2000) Determination of optimum pollen development stage for inducing callus in anther culture of rice. Breed Res 2: 73-79**

Pubmed: [Author and Title](#)

Google Scholar: [Author Only](#) [Title Only](#) [Author and Title](#)

**Koide Y, Ogino A, Yoshikawa T, Kitashima Y, Saito N, Kanaoka Y, Onishi K, Yoshitake Y, Tsukiyama T, Saito H, Teraishi M, Yamagata Y, Uemura A, Takagi H, Hayashi Y, Abe T, Fukuta Y, Okumoto Y, Kanazawa A (2018) Lineage-specific gene acquisition or loss is involved in interspecific hybrid sterility in rice. P Natl Acad Sci USA 115: E1955-E1962**

Pubmed: [Author and Title](#)

Google Scholar: [Author Only](#) [Title Only](#) [Author and Title](#)

**Koide Y, Onishi K, Nishimoto D, Baruah AR, Kanazawa A, Sano Y (2008) Sex-independent transmission ratio distortion system responsible for reproductive barriers between Asian and African rice species. New Phytol 179: 888-900**

Pubmed: [Author and Title](#)

Google Scholar: [Author Only](#) [Title Only](#) [Author and Title](#)

**Li F, Liu FH, Morinaga D, Zhao Z (2011) A new gene for hybrid sterility from a cross between *Oryza sativa* and *O. glaberrima*. Plant Breeding 130: 165-171**

Pubmed: [Author and Title](#)

Google Scholar: [Author Only](#) [Title Only](#) [Author and Title](#)

**McCouch SR, Teytelman L, Xu Y, Lobos KB, Clare K, Walton M, Fu B, Maghirang R, Li Z, Xing Y, Zhang Q, Kono I, Yano M, Fjellstrom R, DeClerck G, Schneider D, Cartinhour S, Ware D, Stein L (2002) Development and mapping of 2240 new SSR markers for rice (*Oryza sativa* L.). DNA Res 9: 199-207**

Pubmed: [Author and Title](#)

Google Scholar: [Author Only](#) [Title Only](#) [Author and Title](#)

**Miyashita T, Araki H, Hoshino Y (2011) Ploidy distribution and DNA content variations of *Lonicera caerulea* (Caprifoliaceae) in Japan. J Plant Res 124: 1-9**

Pubmed: [Author and Title](#)

Google Scholar: [Author Only](#) [Title Only](#) [Author and Title](#)

**Morinaga T, Kuriyama H (1957) Cytogenetical studies on *Oryza sativa* L. IV. The F1 hybrid of *O. sativa* L. and *O. glaberrima* Steud. Japanese Journal of Breeding 7: 57-65**

Pubmed: [Author and Title](#)

Google Scholar: [Author Only](#) [Title Only](#) [Author and Title](#)

**Nagaki K, Cheng ZK, Ouyang S, Talbert PB, Kim M, Jones KM, Henikoff S, Buell CR, Jiang JM (2004) Sequencing of a rice centromere uncovers active genes. Nat Genet 36: 138-145**

Pubmed: [Author and Title](#)

Google Scholar: [Author Only](#) [Title Only](#) [Author and Title](#)

**Naik N, Rout P, Umakanta N, Verma RL, Katara JL, Sahoo KK, Singh ON, Samantaray S (2017) Development of doubled haploids from an elite indica rice hybrid (BS6444G) using anther culture (vol 128, pg 679, 2017). Plant Cell Tiss Org 128: 691-691**

Pubmed: [Author and Title](#)

Google Scholar: [Author Only](#) [Title Only](#) [Author and Title](#)

**Oka HI (1957) Genic analysis for the sterility of hybrids between distantly related varieties of cultivated rice. Journal of Genetics 55: 397-409**

Pubmed: [Author and Title](#)

Google Scholar: [Author Only](#) [Title Only](#) [Author and Title](#)

**Oka HI (1968) Preferential pairing of chromosomes in a tetraploid hybrid between *Oryza glaberrima* and *O. sativa*. Canadian Journal of Genetics and Cytology 10: 527-535**

Pubmed: [Author and Title](#)

Google Scholar: [Author Only](#) [Title Only](#) [Author and Title](#)

**Ouyang YD, Zhang QF (2013) Understanding Reproductive Isolation Based on the Rice Model. Annu Rev Plant Biol 64: 111-135**

Pubmed: [Author and Title](#)

Google Scholar: [Author Only](#) [Title Only](#) [Author and Title](#)

**Pecinka A, Fang W, Rehmsmeier M, Levy AA, Scheid OM (2011) Polyploidization increases meiotic recombination frequency in *Arabidopsis*. BMC Biol 9**

Pubmed: [Author and Title](#)

Google Scholar: [Author Only](#) [Title Only](#) [Author and Title](#)

**Pinson SRM, Rutger JN (1993) Heterozygous Diploid Plants Regenerated from Anther Culture of F1 Rice Plants. In Vitro Cell Dev-PI 29p: 174-179**

Pubmed: [Author and Title](#)

Google Scholar: [Author Only](#) [Title Only](#) [Author and Title](#)

**Ren G, Xu P, Deng X, Zhou J, Hu F, Li J, Li F, Zhang Z, Tao D (2006) A new gamete eliminator from *Oryza glaberrima*. Rice Genetics Newsletter 22: 43-44**

Pubmed: [Author and Title](#)

Google Scholar: [Author Only](#) [Title Only](#) [Author and Title](#)

**Rout P, Naik N, Ngangkham U, Verma RL, Katara JL, Singh ON, Samantaray S (2016) Doubled Haploids generated through anther culture from an elite long duration rice hybrid, CRHR32: Method optimization and molecular characterization. Plant Biotechnol-Nar 33: 177-186**

Pubmed: [Author and Title](#)

Google Scholar: [Author Only](#) [Title Only](#) [Author and Title](#)

**Sano Y (1983) Genetic studies of speciation in cultivated Rice . 3. A new gene controlling sterility in F1 hybrids of 2 cultivated rice species - its association with photoperiod sensitivity. J Hered 74: 435-439**

Pubmed: [Author and Title](#)

Google Scholar: [Author Only](#) [Title Only](#) [Author and Title](#)

**Sano Y (1990) The Genic Nature of Gamete Eliminator in Rice. Genetics 125: 183-191**

Pubmed: [Author and Title](#)

Google Scholar: [Author Only](#) [Title Only](#) [Author and Title](#)

**Sano Y, Chu YE, Oka HI (1979) Genetic-studies of speciation in cultivated rice . 1. Genic analysis for the F1 sterility between *Oryza sativa* L and *O. glaberrima* Steud. Jpn J Genet 54: 121-132**

Pubmed: [Author and Title](#)

Google Scholar: [Author Only](#) [Title Only](#) [Author and Title](#)

**Taguchi K, Doi K, Yoshimura A (1999) RFLP mapping of S19, a gene for F1 pollen semi-sterility found in backcross progeny of *Oryza sativa* and *O. glaberrima*. Rice Genetics Newsletter 16: 70**

Pubmed: [Author and Title](#)

Google Scholar: [Author Only](#) [Title Only](#) [Author and Title](#)

**Telmer CA, Simmonds DH, Newcomb W (1992) Determination of Developmental Stage to Obtain High-Frequencies of Embryogenic Microspores in Brassica-Napus. Physiol Plantarum 84: 417-424**

Pubmed: [Author and Title](#)

Google Scholar: [Author Only](#) [Title Only](#) [Author and Title](#)

**Woo SC, Mok T, Huang JY (1978) Anther Culture of *Oryza-Sativa*-L and *Oryza-Perennis* Moench Hybrids. Bot Bull Acad Sinica 19: 171-178**

Pubmed: [Author and Title](#)

Google Scholar: [Author Only](#) [Title Only](#) [Author and Title](#)

**Xie YY, Tang JT, Xie XR, Li XJ, Huang JL, Fei Y, Han JL, Chen SF, Tang HW, Zhao XC, Tao DY, Xu P, Liu YG, Chen LT (2019) An asymmetric allelic interaction drives allele transmission bias in interspecific rice hybrids. Nat Commun 10**

Pubmed: [Author and Title](#)

Google Scholar: [Author Only](#) [Title Only](#) [Author and Title](#)

**Xie YY, Xu P, Huang JL, Ma SJ, Xie XR, Tao DY, Chen LT, Liu YG (2017) Interspecific Hybrid Sterility in Rice Is Mediated by OgTPR1 at the S1 Locus Encoding a Peptidase-like Protein. Mol Plant 10: 1137-1140**

Pubmed: [Author and Title](#)

Google Scholar: [Author Only](#) [Title Only](#) [Author and Title](#)

**Xu P, Zhou JW, Li J, Hu FY, Deng XN, Feng SF, Ren GY, Zhang Z, Deng W, Tao DY (2014) Mapping three new interspecific hybrid sterile loci between *Oryza sativa* and *O. glaberrima*. Breed Sci 63: 476-482**

Pubmed: [Author and Title](#)

Google Scholar: [Author Only](#) [Title Only](#) [Author and Title](#)

**Yang JY, Zhao XB, Cheng K, Du HY, Ouyang YD, Chen JJ, Qiu SQ, Huang JY, Jiang YH, Jiang LW, Ding JH, Wang J, Xu CG, Li XH, Zhang QF (2012) A Killer-Protector System Regulates Both Hybrid Sterility and Segregation Distortion in Rice. Science 337: 1336-1340**

Pubmed: [Author and Title](#)

Google Scholar: [Author Only](#) [Title Only](#) [Author and Title](#)

**Yu X, Zhao Z, Zheng X, Zhou J, Kong W, Wang P, Bai W, Zheng H, Zhang H, Li J, Liu J, Wang Q, Zhang L, Liu K, Yu Y, Guo X, Wang J, Lin Q, Wu F, Ren Y, Zhu S, Zhang X, Cheng Z, Lei C, Liu S, Liu X, Tian Y, Jiang L, Ge S, Wu C, Tao D, Wang H, Wan J (2018) A selfish genetic element confers non-Mendelian inheritance in rice. Science 360: 1130-1132**

Pubmed: [Author and Title](#)

Google Scholar: [Author Only](#) [Title Only](#) [Author and Title](#)

**Zhang Z, Xu P, Hu F, Zhou J, Li J, Deng X, Ren G, Li F, Tao D (2006) A new sterile gene from *Oryza glaberrima* on chromosome 3. Rice Genetics Newsletter 22: 26-28**

Pubmed: [Author and Title](#)

Google Scholar: [Author Only](#) [Title Only](#) [Author and Title](#)

**Zhu YF, Yu YM, Cheng K, Ouyang YD, Wang J, Gong L, Zhang QH, Li XH, Xiao JH, Zhang QF (2017) Processes Underlying a Reproductive Barrier in indica-japonica Rice Hybrids Revealed by Transcriptome Analysis. Plant Physiology 174: 1683-1696**

Pubmed: [Author and Title](#)

Google Scholar: [Author Only](#) [Title Only](#) [Author and Title](#)
